# Supplementary material
Source: PubMed Central journal article supplement (PMC5067751)
Supplement: IAI.00657-16_zii999091864so1.pdf [file IAI.00657-16_zii999091864so1.pdf]

Table S1. Primer sequences for cloning C-terminal TRP32 constructs.

| Construct (amino acids) | Forward (5'→3')                    | Reverse (5'→3')                     |
|-------------------------|------------------------------------|-------------------------------------|
| C1 (138-162)            | aaaagtcgacGGACAAGACCATGTTAGTTTAT   | aaaagaattcAGACAAATAATTCATTGTACTAAAA |
| C2 (158-182)            | aaaagtcgacATGAATTATTTGTCTGGTTAT    | aaaagaattcATCAAATAATAATAAGGATTATAAC |
| C3 (178-198)            | aaaagtcgacTATTATTATTTGATTATGTTACTC | aaaagaattcCTACTCTAAACTACTTTCACTA    |
| C4 (158-177)            | aaaagtcgacATGAATTATTTGTCTGGTTAT    | aaaagaattcAGGATTATAACAACAATAATGATG  |
| C5 (181-198)            | aaaagtcgacTTGATTATGTTACTCCAGATTAT  | aaaagaattcCTACTCTAAACTACTTTCACTA    |

Non-annealing sequences are shown in lowercase and contain restriction sites for Sall (gtcgac) and EcoRI (gaattc).

Table S2. Probe sequences used for EMSA.

| Probe Name       | Sequence (5'→3')              |
|------------------|-------------------------------|
| MEME Motif 1     | CAGCACTTTGGGAGGCTGAGGCAGG     |
| MEME Motif 2     | GGGGTTTCACCATGTTGGCCAGGCTGGTC |
| MEME Motif3 (WT) | GCCGGGCGTGTTGGCGGGCACCTGTAATC |
| Mutant1 (Δ1)     | AAAAAAAAAAGTGGCGGGCACCTGTAATC |
| Mutant 2(Δ2)     | GCCGGGCGTAAAAAAAAAACCTGTAATC  |
| Mutant 3(Δ3)     | GCCGGGCGTGTTGGCGGGCAAAAAAAAAA |

Table S3. QPCR primer sequences for TRP32 targets.

| Gene           | Name     | Forward                  | Reverse                 | T <sub>m</sub> | Product Size |
|----------------|----------|--------------------------|-------------------------|----------------|--------------|
| NM_001037171.1 | ACOT9    | CCCTCAGGAGCGGAACATTT     | GGGCCACTCATGGAGTTGAA    | 60             | 384          |
| NM_001101.3    | ACTB     | GATGATGATATCGCCGCGCTC    | TCGTCGCCACATAGGAATC     | 61             | 167          |
| NM_001272071   | AP1S2    | TGCAGCTTCCTTGAGTGCGA     | ACGTGGGGTTTCAGCTTCTTTCG | 64             | 318          |
| NM_181720      | ARHGAP30 | GGGCACAGGTCTTGGGGGAT     | GGTCTGGCTTCCGCTCTGAC    | 63.5           | 287          |
| NM_001199456.1 | BRD2     | GCTCGTGGAGGGGAATACAG     | TTTGGGATTGGACACCTCCG    | 60             | 201          |
| NM_001300944   | C11orf30 | TTGGGTGAAAGACCAAGTTACAGT | CATTGGAGGCAGGACTGGCA    | 61.4           | 313          |
| NM_001301837   | C12orf57 | ACGAGGCTCGGGATAACGCC     | GCACAAGGGAGGGCCAACCTC   | 64             | 205          |
| NM_001256373   | C12orf79 | GCTTTTGCCTTTTCATCACCTGC  | TTGCCAGCCTCCTTCTGACAC   | 61.3           | 343          |

|                |         |                           |                           |      |     |
|----------------|---------|---------------------------|---------------------------|------|-----|
| NM_001105530   | CAP1    | GGAGAGCGGCTGATCGCAGT      | ACAGGACCAGCAAGCAGCGA      | 64.6 | 200 |
| NM_007276      | CBX3    | GCTGAAAGTGGTCCCAAAGGGGTA  | CGACAAATTCTTCAGGCTCTGCCTC | 64.3 | 361 |
| NM_001300964   | CDK19   | CCTCGCCTCCCAGTCACTG       | AGATCTTGGAAGTGCATGGGC     | 64   | 289 |
| NM_138363.1    | CEP95   | GGCTCGGATGCTGAGTGGGT      | CTGCAAGTAGTCCAAGGCCAGTG   | 64   | 228 |
| NM_182523      | CMC1    | ACCCCGCAGACCAGCATCTC      | TGCTTGTGGAAGCTTCTGTAGCC   | 64   | 306 |
| NM_001297733   | COX18   | ATCCTGGCCAAGCTAGGTGGAAAAT | GTCGGGTGCAGTGAGGTCAGG     | 64.6 | 349 |
| NM_001012967   | DDX60L  | AGGCAAAGGTGTTGTCAGTGC     | TCCGGGAGTTCGGCAAGGAT      | 62.5 | 400 |
| NM_017925      | DENND4c | TTGCCCCAGGAAGAAGCCGT      | TGGAGAGCTGATGGAGTGGCTT    | 63.8 | 286 |
| NM_019030      | DHX29   | CCCCCTCCAGGAGTCAGGAAG     | AAGCCATCTCTGACCCGCC       | 63.9 | 212 |
| NM_024963      | FBXL18  | GCCAACGCCAGTTCTTCCAG      | ACCACCACAGGTTCCGGCGG      | 64.6 | 352 |
| NM_031904      | FRMD8   | GTGCCCTGGCTGTGGAGAAC      | CACGTCATCGTCTGGGGCACT     | 65.1 | 225 |
| NM_017769      | G2E3    | GGACCAGAAAATACCCAGCCAA    | AGGGTGTGTGGACTCTCTGAA     | 60.5 | 235 |
| NM_138801.2    | GALM    | GGCTTCGCCGAGTTGGAAGG      | CGCCATTTGACAGCACCCGA      | 64   | 208 |
| NM_001256488   | GOLGB1  | TCCGTCCCAACTGCTAGTGGC     | AGCCAGGCGCTCCTGAACAT      | 64.4 | 327 |
| NM_021639      | GPBP1L1 | CGCTGCCCGTTGGTGTCTCA      | CACGAACAGCAGCTTTCAAGGCA   | 64.9 | 399 |
| NM_005684      | GPR52   | AGCGTCACTCCTGCCCACTT      | ACTCGTGGACACCTGTGGAGT     | 63.4 | 264 |
| NM_021958      | HLX     | CCCCCTCCAGCAAAGACCTCA     | GCGCGACCATGAACGCTTCC      | 64.4 | 338 |
| NM_001130689   | HMGB2   | CTTGGCACGATATGCAGCAA      | CAGCCAAAGATAAACAACCATATGA |      |     |
| NM_194247      | HNRNPA3 | TTGGAAGAGGCGAGTCCGGT      | ACACGCCATCAACCTTGTGT      | 63.1 | 337 |
| NM_022465      | IKZF4   | ATGACGGCGGTTCCCCTCACTT    | AAGAGTGCTGGCTGTTGGGGG     | 65.6 | 354 |
| NM_001267728   | ING1    | ACGATTGGTCGCTGAGGCGG      | CGCGTTCTCACGGTTCTCGT      | 64.2 | 397 |
| NM_001297655   | KIF2C   | CCTTGCTGACTCTCCGAATGGC    | CCTGAGCCGTGATGCGAAGC      | 63.8 | 393 |
| NM_182931      | KMT2E   | GGGGTTCGGGTGTCTCGTGT      | GCTCATGACGTTGCCTCTGG      | 63.9 | 227 |
| NM_014708      | KNTC1   | CGCAGACCATCGAATCCTGCT     | CCCGATCGCCGGTACTGGAT      | 63.4 | 229 |
| NM_002298      | LCP1    | TGATTTTTGGTGGGGCGGGGA     | GGCAAAGGCAAGCAAGCAGCC     | 65.2 | 371 |
| NM_001282460   | LRRC63  | GTGCCAAGCCCTCCACCTATGA    | GGCCAGGTTGGTCATGGCTGTT    | 64.9 | 348 |
| NM_005911      | MAT2A   | GCCCGCTGCTTCGTTCCG        | TCCTGCTGAAGGTGGGCATCAA    | 63   | 278 |
| NM_001130079   | MOV10   | G TTCAGAGGGCCCCAAGCGGTA   | CGAGTCTGAAGAACCTGACCCGA   | 65.2 | 369 |
| NM_014046      | MRPS18B | CGCCACACGGGTATCATCT       | TCCGCTGGTGTCTAGGGGG       | 62.7 | 351 |
| NM_001099286   | MTFR2   | TTCCTAACGCCCTCCGCTTGA     | CAGAGTTCAAGAGCGGGATCAACT  | 63.2 | 303 |
| NM_001123226.1 | MTO1    | AGTGATTCAGCCAGGCTACG      | CACTGGTGCCAGAGTAGTG       | 60   | 386 |
| NM_002475      | MYL6B   | GGCCAAGAACCAGGCCAAG       | TGGCTGGAACGTGCTTTCGC      | 64   | 287 |
| NM_001144030   | NAT10   | GGTCCCTTCTCGCTCGCCATC     | GCAGCACACACATGCCGAAGG     | 65   | 393 |

|              |         |                           |                          |      |     |
|--------------|---------|---------------------------|--------------------------|------|-----|
| NM_173638.4  | NBPF15  | TGGGTCTCAATTTTTACTGTGCCT  | ACCCACCAAAACCAATCAGCA    | 61   | 207 |
| NM_004289    | NFE2L3  | CGGATGTGCGAGCGAGGAGA      | CTCCCAATGAGATGCCCTCCAGT  | 64.2 | 296 |
| NM_207308    | NUP210L | CTTGCGTCTACACCGCCTCC      | TGAGGCGTATCGGTTGCGTAGA   | 63.5 | 260 |
| NM_016081    | PALLD   | GCTGAGAGGGAAACGAACGG      | AGACTTTGTATTCTGATTAGCTGT | 59.5 | 397 |
| NM_017851    | PARP16  | TCGCCCTTGCCCTAACCCAG      | AATCCAGCTCACCAGGTCCCA    | 63.8 | 320 |
| NM_001048183 | PHACTR4 | CTCCCTTTTTCCCCCTCCCCG     | TCTGTAGTGGGCTGGTCTGCT    | 63.7 | 200 |
| NM_017934    | PHIP    | GCTGGTGTAGCCAGTAGGCA      | GCCATCACTGTGCCATGCTCT    | 62.6 | 342 |
| NM_178136.2  | POLDIP3 | GGGGTAGCGGAGGTGGTGTT      | TCAGGGTCCACTTCGGCAGG     | 64   | 245 |
| NM_007215    | POLG2   | TGGGGACCTAGACCGAGGCA      | ACCAGGCCACACAGAAATCCCA   | 64.3 | 232 |
| NM_020366    | RPGRIP1 | CCCTTGAGCAGGATGAACCG      | GGCCCCCTCTTGGGTTTCTC     | 61.6 | 386 |
| NM_001253382 | RPL15   | AGATAGGTCTCCCTCCTGTGCGGC  | ACAGTGGCGTCCAGCTCGCTC    | 67.4 | 373 |
| NM_000986    | RPL24   | CGTGGAGCTGTGCGCCATGAA     | TTTACTGCTCGGCGGGTTC      | 63.2 | 246 |
| NM_001030009 | RPS15A  | CTTCCGCGCCGCCACAAT        | ACTGGCGGGATGGAAGCAGA     | 64.1 | 312 |
| NM_001025    | RPS23   | TTGTGGCTCCTTCTGCGGT       | TGCGACCAAATCCAGCAACCAG   | 64.1 | 379 |
| NM_025158    | RUFY1   | TGAGATCGTGGACCGAAGCCAG    | AGCCGACTGGAGCAACACCTT    | 64.3 | 286 |
| NM_012240.2  | SIRT4   | AGTGTCCGTAGAGCTGTGAGAGAA  | AGTGTGCAGGGTTAGGCTGGT    | 63   | 399 |
| NM_020846    | SLAIN2  | CCATCCTCAACCCCAGTGCGA     | GAACCAGAACTGCGCCGAGA     | 63.6 | 269 |
| NM_003049    | SLC10A1 | ATGCCCTCACGGCCTTTGT       | AGCGCATGTATTGTGGCCGTT    | 64.1 | 343 |
| NM_001145250 | SP9     | ATCCGCCAGCGCCATA          | TCAATGTGCTTCTGGGAATCC    |      |     |
| NM_003971    | SPAG9   | TCAGCCGACTTTTCAGCTCCT     | TCCAGCCAAAAGCCTGCACT     | 62   | 279 |
| NM_172209    | TAPBP   | TCTGCTCCTCGCTGTGGCTT      | GGGACCCGGAGCCAGAGATG     | 64.1 | 322 |
| NM_001205201 | TEX28   | AGCCCCGTGTGATTGTTGAGGA    | AGGGACCGCATGAAGGCAC      | 64.6 | 234 |
| NM_144632    | TMEM182 | ATGCTCCTGGGGTAGTTGCT      | GAAGGGGTGAAATCCAGGCAGT   | 62.9 | 224 |
| NM_018247    | TMEM30A | GCGAAGACTCGGAGACCGGA      | AGGGACTGGAAGGCTCTGTTCC   | 63.7 | 205 |
| NM_021109.3  | TMSB4X  | GTGCGCCTCGCTTCGCTTTT      | CGCGGCCTTCGTTGTCAGTAG    | 64   | 329 |
| NM_000550    | TYRP1   | AGGATGTGCTCAGTGCTTGGA     | TCTGTGTTGGTGACTGGGGGC    | 64.3 | 361 |
| NM_001039590 | USP9X   | AGTCAAACCTCAGCGAAGTCCCA   | GCCTGAGGAGCACATAGCCAC    | 63.5 | 269 |
| NM_007146    | VEZF1   | AAAGACCCTTCAAATGCCAAACGTG | AGGTTTGGCACAGGTTAGCAGC   | 63.6 | 390 |
| NM_022553    | VPS52   | AAGGTTCCGGGGCTAGTTTGT     | CCCCAAGTTGCAGTGGTTCCTG   | 62.8 | 345 |
| NM_032786    | ZC3H10  | GGGTAGGCGGCTCTTTGTCTG     | AACGCTTGCTCGCTTGAC       | 64   | 351 |
